# Supplementary material for: The Arabic Version of the Impact of Event Scale-Revised: Psychometric Evaluation among Psychiatric Patients and the General Public within the Context of COVID-19 Outbreak and Quarantine as Collective Traumatic Events
Source: MDPI journal article supplement (doi:10.3390/jpm12050681), 2022-04-24
Supplement: s1 [file s1]

**Table S1.** Factors and corresponding items on every model

| Factors                           | Items comprising factors in each model |                      |                            |                               |                               |
|-----------------------------------|----------------------------------------|----------------------|----------------------------|-------------------------------|-------------------------------|
|                                   | Model 1                                | Model 2/Model 3○     | Model 4                    | Model 5/Model 6○              | Model 7/Model 8○/<br>Model 9▲ |
| COVID-19 trauma                   | 1-22                                   |                      |                            |                               |                               |
| Avoidance                         |                                        | 5,7,8,11,12,13,17,22 | 5, 8, 11, 22               | 8, 11, 22                     | 5,8,11,17,22                  |
| Intrusion                         |                                        | 1,2,3,6,9,14,16,20   | 1, 3, 6, 9, 14, 16, 19, 20 | 1, 3, 5, 6, 9, 14, 16, 19, 20 | 1,3,6,9,20                    |
| Hyperarousal                      |                                        | 4,10,15,18,19,21     | 4, 10, 21                  | 4, 10                         | 16,18,19, 21                  |
| Difficulty sleeping/concentrating |                                        |                      | 2, 15, 18                  | 2, 15, 18                     |                               |
| Numbing                           |                                        |                      | 7, 12, 13, 17              | 7, 12, 13, 17, 21             | 7,12,13,14                    |
| Sleep problems                    |                                        |                      |                            |                               | 2,15                          |
| Irritability/dysphoria            |                                        |                      |                            |                               | 4,10                          |

○: Bifactor model comprising a general factor in addition to domain-specific factors; ▲: second order factor.
