# Supplementary material for: The Arabic Version of the Impact of Event Scale-Revised: Psychometric Evaluation among Psychiatric Patients and the General Public within the Context of COVID-19 Outbreak and Quarantine as Collective Traumatic Events
Source: MDPI journal article supplement (doi:10.3390/jpm12050681), 2022-04-24
Supplement: s1 [file s1]

**Supplementary Table S2.** Goodness-of-fit indices for structural equation models examining interactions among factors comprising the Arabic version of the Impact of Event Scale-Revised (IES-R)

| Sample     | $\chi^2$ | <i>df</i> | p     | CFI   | TLI   | RMSEA | RMSEA 90% CI   | SRMR   |
|------------|----------|-----------|-------|-------|-------|-------|----------------|--------|
| Quarantine | 6.334    | 6         | 0.387 | 0.999 | 0.998 | 0.016 | 0.000 to 0.092 | 0.0221 |
| Sample 1   | 5.663    | 5         | 0.340 | 0.999 | 0.996 | 0.028 | 0.000 to 0.114 | 0.0226 |
| Sample 2   | 5.902    | 3         | 0.116 | 0.999 | 0.995 | 0.031 | 0.000 to 0.069 | 0.0100 |

$\chi^2$ : chi-square; *df*: degrees of freedom; CFI: comparative fit index; TLI: Tucker–Lewis index; RMSEA: root mean square error of approximation; CI: confidence interval; SRMR: standardized root mean residual.
