# Supplementary material for: The Arabic Version of the Impact of Event Scale-Revised: Psychometric Evaluation among Psychiatric Patients and the General Public within the Context of COVID-19 Outbreak and Quarantine as Collective Traumatic Events
Source: MDPI journal article supplement (doi:10.3390/jpm12050681), 2022-04-24
Supplement: s1 [file s1]

أذكر ان كنت قد عانيت او عانيتي من احدى او بعض الأعراض التالية خلال الايام السبعة الأخيرة.

١- (١٨٣) أذكر باستمرار رغم ارادتي بالذي حصل

|                    |            |             |                 |            |
|--------------------|------------|-------------|-----------------|------------|
| لا على الإطلاق = 0 | قليلاً = ١ | أحياناً = ٢ | بعض الأحيان = ٣ | كثيراً = ٤ |
|--------------------|------------|-------------|-----------------|------------|

٢- (١٨٤) احاول ان لا اغضب عندما افكر بالذي تعرضت له، او عندما يذكرني شخص ما بذلك

|                    |            |             |                 |            |
|--------------------|------------|-------------|-----------------|------------|
| لا على الإطلاق = 0 | قليلاً = ١ | أحياناً = ٢ | بعض الأحيان = ٣ | كثيراً = ٤ |
|--------------------|------------|-------------|-----------------|------------|

٣- (١٨٥) لقد حاولت ان انزعها من ذاكرتي.

|                    |            |             |                 |            |
|--------------------|------------|-------------|-----------------|------------|
| لا على الإطلاق = 0 | قليلاً = ١ | أحياناً = ٢ | بعض الأحيان = ٣ | كثيراً = ٤ |
|--------------------|------------|-------------|-----------------|------------|

٤- (١٨٦) اجد صعوبة في النوم او انام بقلق

|                    |            |             |                 |            |
|--------------------|------------|-------------|-----------------|------------|
| لا على الإطلاق = 0 | قليلاً = ١ | أحياناً = ٢ | بعض الأحيان = ٣ | كثيراً = ٤ |
|--------------------|------------|-------------|-----------------|------------|

٥- (١٨٧) اتضايق من احساسيس قوية (عارمة) تعود باستمرار عندما افكر بالحوادث

|                    |            |             |                 |            |
|--------------------|------------|-------------|-----------------|------------|
| لا على الإطلاق = 0 | قليلاً = ١ | أحياناً = ٢ | بعض الأحيان = ٣ | كثيراً = ٤ |
|--------------------|------------|-------------|-----------------|------------|

٦- (١٨٨) ارى الذي حدث في الحلم

|                    |            |             |                 |            |
|--------------------|------------|-------------|-----------------|------------|
| لا على الإطلاق = 0 | قليلاً = ١ | أحياناً = ٢ | بعض الأحيان = ٣ | كثيراً = ٤ |
|--------------------|------------|-------------|-----------------|------------|

٧- (١٨٩) احاول تجنب كل ما يذكرني بما حدث

|                    |            |             |                 |            |
|--------------------|------------|-------------|-----------------|------------|
| لا على الإطلاق = 0 | قليلاً = ١ | أحياناً = ٢ | بعض الأحيان = ٣ | كثيراً = ٤ |
|--------------------|------------|-------------|-----------------|------------|

٨- (١٩٠) لدي احساس بان الذي حدث ليس واقعياً وانه في الحقيقة لم يحصل ابداً

|                    |            |             |                 |            |
|--------------------|------------|-------------|-----------------|------------|
| لا على الإطلاق = 0 | قليلاً = ١ | أحياناً = ٢ | بعض الأحيان = ٣ | كثيراً = ٤ |
|--------------------|------------|-------------|-----------------|------------|

٩- (١٩١) حاولت تجنب التكلم عن ما حدث

|                    |            |             |                 |            |
|--------------------|------------|-------------|-----------------|------------|
| لا على الإطلاق = 0 | قليلاً = ١ | أحياناً = ٢ | بعض الأحيان = ٣ | كثيراً = ٤ |
|--------------------|------------|-------------|-----------------|------------|

١٠- (١٩٢) صور في الذاكرة عن ما حدث خطرت في ذهني

|                    |            |             |                 |            |
|--------------------|------------|-------------|-----------------|------------|
| لا على الإطلاق = 0 | قليلاً = ١ | أحياناً = ٢ | بعض الأحيان = ٣ | كثيراً = ٤ |
|--------------------|------------|-------------|-----------------|------------|

١١- (١٩٣) اشياء في محيطي (حوالي) تذكرني بالذي حصل

|                    |          |             |                 |            |
|--------------------|----------|-------------|-----------------|------------|
| لا على الإطلاق = 0 | قليل = ١ | احياناً = ٢ | بعض الأحيان = ٣ | كثيراً = ٤ |
|--------------------|----------|-------------|-----------------|------------|

١٢- (١٩٤) انا ادرك بانه لايزال لدي احساس قوي لها علاقة بالذي حدث، وليس باستطاعتي التخلص منها

|                    |          |             |                 |            |
|--------------------|----------|-------------|-----------------|------------|
| لا على الإطلاق = 0 | قليل = ١ | احياناً = ٢ | بعض الأحيان = ٣ | كثيراً = ٤ |
|--------------------|----------|-------------|-----------------|------------|

١٣- (١٩٥) ابذل جهدي لتجنب التفكير بما حدث

|                    |          |             |                 |            |
|--------------------|----------|-------------|-----------------|------------|
| لا على الإطلاق = 0 | قليل = ١ | احياناً = ٢ | بعض الأحيان = ٣ | كثيراً = ٤ |
|--------------------|----------|-------------|-----------------|------------|

١٤- (١٩٦) كل ما يذكرني بالذي حصل، يوقظ لدي احساس قوي

|                    |          |             |                 |            |
|--------------------|----------|-------------|-----------------|------------|
| لا على الإطلاق = 0 | قليل = ١ | احياناً = ٢ | بعض الأحيان = ٣ | كثيراً = ٤ |
|--------------------|----------|-------------|-----------------|------------|

١٥- (١٩٧) احساس بالنسبة لما حدث هي نوعاً ما متزعزعة

|                    |          |             |                 |            |
|--------------------|----------|-------------|-----------------|------------|
| لا على الإطلاق = 0 | قليل = ١ | احياناً = ٢ | بعض الأحيان = ٣ | كثيراً = ٤ |
|--------------------|----------|-------------|-----------------|------------|

١٦- (١٩٨) شعرت باني غاضب، مفتاظ وسريع الانفعال

|                    |          |             |                 |            |
|--------------------|----------|-------------|-----------------|------------|
| لا على الإطلاق = 0 | قليل = ١ | احياناً = ٢ | بعض الأحيان = ٣ | كثيراً = ٤ |
|--------------------|----------|-------------|-----------------|------------|

١٧- (١٩٩) شعرت باني مرتعش (مرتجف) وسريع الخوف

|                    |          |             |                 |            |
|--------------------|----------|-------------|-----------------|------------|
| لا على الإطلاق = 0 | قليل = ١ | احياناً = ٢ | بعض الأحيان = ٣ | كثيراً = ٤ |
|--------------------|----------|-------------|-----------------|------------|

١٨- (٢٠٠) اكتشف باني اتصرف واشعر وكأن الذي حدث سوف يتكرر حدوثه ثانية

|                    |          |             |                 |            |
|--------------------|----------|-------------|-----------------|------------|
| لا على الإطلاق = 0 | قليل = ١ | احياناً = ٢ | بعض الأحيان = ٣ | كثيراً = ٤ |
|--------------------|----------|-------------|-----------------|------------|

١٩- (٢٠١) لدي صعوبة في النوم

|                    |          |             |                 |            |
|--------------------|----------|-------------|-----------------|------------|
| لا على الإطلاق = 0 | قليل = ١ | احياناً = ٢ | بعض الأحيان = ٣ | كثيراً = ٤ |
|--------------------|----------|-------------|-----------------|------------|

٢٠- (٢٠٢) لدي صعوبة في التركيز

|                    |          |             |                 |            |
|--------------------|----------|-------------|-----------------|------------|
| لا على الإطلاق = 0 | قليل = ١ | احياناً = ٢ | بعض الأحيان = ٣ | كثيراً = ٤ |
|--------------------|----------|-------------|-----------------|------------|

٢١- (٢٠٣) عندما أذكر بالذي حصل، ينتابني اعراض كالتعرق، صعوبة في التنفس، دوخة او خفقان في القلب

|                    |          |             |                 |            |
|--------------------|----------|-------------|-----------------|------------|
| لا على الإطلاق = 0 | قليل = ١ | احياناً = ٢ | بعض الأحيان = ٣ | كثيراً = ٤ |
|--------------------|----------|-------------|-----------------|------------|

٢٢- (٢٠٤) انا فطن باستمرار

|                    |          |             |                 |            |
|--------------------|----------|-------------|-----------------|------------|
| لا على الإطلاق = 0 | قليل = ١ | احياناً = ٢ | بعض الأحيان = ٣ | كثيراً = ٤ |
|--------------------|----------|-------------|-----------------|------------|

(٥,٣,١,٠)
