# Supplementary material for: The Arabic Version of the Impact of Event Scale-Revised: Psychometric Evaluation among Psychiatric Patients and the General Public within the Context of COVID-19 Outbreak and Quarantine as Collective Traumatic Events
Source: J Pers Med. 2022 Apr 24;12(5):681. doi: 10.3390/jpm12050681 (PMC9144426; doi:10.3390/jpm12050681)
Supplement: Supplementary file 1 [file jpm-12-00681-s001.zip]

Archive with 5 entries (5 files):
- Arabic Version of the Impact of Event Scale-Revised (IES-R).PDF
- IES-R HTMT_Supplementary excel S2.xlsx
- IES-R Supplementary excel S1.xlsx
- Supplementary Table S1.pdf
- Supplementary Table S2.pdf
