# Supplementary material for: The Arabic Version of the Impact of Event Scale-Revised: Psychometric Evaluation among Psychiatric Patients and the General Public within the Context of COVID-19 Outbreak and Quarantine as Collective Traumatic Events
Source: J Pers Med. 2022 Apr 24;12(5):681. doi: 10.3390/jpm12050681 (PMC9144426; doi:10.3390/jpm12050681)
Supplement: Supplementary file 1 [file jpm-12-00681-s001.zip › IES-R HTMT_Supplementary excel S2.xlsx]

## Sheet: HTMT Patient
patients
Implied Correlations (Group number 1 - Default model)
	IES_10	IES_4	IES_15	IES_2	IES_21	IES_19	IES_18	IES_16	IES_14	IES_13	IES_12	IES_7	IES_20	IES_9	IES_6	IES_3	IES_1	IES_22	IES_17	IES_11	IES_8	IES_5
IES_10																							Monotrait correlations
IES_4	0.805																						Irritability Ir	0.805
IES_15	0.533	0.505																					Sleep S	0.636
IES_2	0.481	0.456	0.636																				Hyperarousal H	0.4655
IES_21	0.34	0.322	0.35	0.316																			Numbing N	0.328833
IES_19	0.443	0.42	0.456	0.412	0.354																		Intrusion In	0.4436
IES_18	0.487	0.462	0.502	0.454	0.39	0.508																	Avoidance A	0.4721
IES_16	0.516	0.489	0.532	0.48	0.412	0.537	0.592
IES_14	0.306	0.291	0.23	0.208	0.24	0.313	0.344	0.364															Heterotrait correlations
IES_13	0.253	0.24	0.19	0.172	0.198	0.258	0.284	0.301	0.349														Ir-S	0.49375
IES_12	0.281	0.266	0.211	0.191	0.22	0.286	0.315	0.333	0.388	0.32													Ir-H	0.434875
IES_7	0.242	0.23	0.182	0.164	0.19	0.247	0.272	0.288	0.334	0.276	0.306												Ir-N	0.263625
IES_20	0.251	0.238	0.234	0.212	0.178	0.232	0.255	0.27	0.188	0.155	0.172	0.148											Ir-In	0.3955
IES_9	0.445	0.422	0.415	0.375	0.315	0.411	0.452	0.479	0.332	0.275	0.304	0.263	0.304										Ir-A	0.3376
IES_6	0.485	0.46	0.453	0.409	0.344	0.448	0.494	0.522	0.363	0.299	0.332	0.287	0.331	0.587									S-H	0.43775
IES_3	0.383	0.363	0.358	0.323	0.272	0.354	0.39	0.412	0.286	0.236	0.262	0.226	0.261	0.464	0.506								S-N	0.1935
IES_1	0.466	0.442	0.435	0.393	0.331	0.431	0.474	0.502	0.348	0.288	0.319	0.275	0.318	0.564	0.615	0.486							S-In	0.3607
IES_22	0.328	0.311	0.305	0.275	0.246	0.321	0.353	0.374	0.308	0.254	0.282	0.244	0.203	0.359	0.392	0.309	0.376						S-A	0.3062
IES_17	0.339	0.321	0.315	0.284	0.254	0.331	0.365	0.386	0.318	0.263	0.291	0.251	0.209	0.371	0.404	0.319	0.389	0.437					H-N	0.278313
IES_11	0.373	0.354	0.346	0.313	0.28	0.365	0.401	0.425	0.35	0.289	0.321	0.277	0.23	0.408	0.445	0.352	0.428	0.481	0.497				H-In	0.3783
IES_8	0.338	0.321	0.314	0.284	0.254	0.33	0.364	0.385	0.318	0.262	0.291	0.251	0.209	0.37	0.404	0.319	0.388	0.436	0.451	0.496			H-A	0.34165
IES_5	0.355	0.336	0.329	0.297	0.266	0.347	0.382	0.404	0.333	0.275	0.305	0.263	0.219	0.388	0.423	0.334	0.407	0.458	0.473	0.52	0.472		N-In	0.2679
																							N-A	0.2873
																							In-A	0.3462
																							HTMT ratio
																							Ir-S	0.69005
																							Ir-H	0.710406
																							Ir-N	0.430654
																							Ir-In	0.66184
																							Ir-A	0.54763
																							S-H	0.804522
																							S-N	0.423121
																							S-In	0.679081
																							S-A	0.558804
																							H-N	0.711353
																							H-In	0.832493
																							H-A	0.728794
																							N-In	0.701438
																							N-A	0.729173
																							In-A	0.756509
																							Column1	Column2	Column3	Column4	Column5	Column6	Column7
																								Avoidance	Intrusion	Numbing	Hyperarousal	Sleep	Irritability
																							Avoidance	--
																							Intrusion	0.76	--
																							Numbing	0.73	0.7	--
																							Hyperarousal	0.73	0.83	0.71	--
																							Sleep	0.56	0.68	0.42	0.8	--
																							Irritability	0.55	0.66	0.43	0.71	0.69	--

## Sheet: HTMT community
Implied Correlations (Group number 1 - Default model)
	IES_10	IES_4	IES_15	IES_2	IES_21	IES_19	IES_18	IES_16	IES_14	IES_13	IES_12	IES_7	IES_20	IES_9	IES_6	IES_3	IES_1	IES_22	IES_17	IES_11	IES_8	IES_5
IES_10																							Monotrait correlations
IES_4	0.768																						Irritability Ir	0.768
IES_15	0.452	0.419																					Sleep S	0.63
IES_2	0.373	0.345	0.63																				Hyperarousal H	0.431333
IES_21	0.402	0.373	0.436	0.359																			Numbing N	0.342167
IES_19	0.345	0.319	0.373	0.308	0.334																		Intrusion In	0.3437
IES_18	0.47	0.435	0.509	0.42	0.455	0.39																	Avoidance A	0.4751
IES_16	0.481	0.446	0.521	0.43	0.466	0.399	0.544
IES_14	0.393	0.364	0.363	0.299	0.327	0.28	0.382	0.391															Heterotrait correlations
IES_13	0.312	0.289	0.288	0.238	0.26	0.223	0.304	0.311	0.401														Ir-S	0.39725
IES_12	0.365	0.338	0.337	0.278	0.304	0.26	0.355	0.364	0.47	0.373													Ir-H	0.408875
IES_7	0.231	0.214	0.213	0.176	0.192	0.165	0.225	0.23	0.297	0.236	0.276												Ir-N	0.31325
IES_20	0.226	0.209	0.234	0.193	0.214	0.183	0.25	0.256	0.22	0.175	0.204	0.129											Ir-In	0.3253
IES_9	0.344	0.318	0.356	0.294	0.326	0.279	0.38	0.39	0.335	0.266	0.311	0.197	0.236										Ir-A	0.2849
IES_6	0.41	0.38	0.425	0.35	0.388	0.333	0.453	0.464	0.399	0.317	0.371	0.235	0.281	0.428									S-H	0.4195
IES_3	0.352	0.326	0.365	0.301	0.333	0.286	0.389	0.399	0.343	0.272	0.319	0.202	0.241	0.368	0.438								S-N	0.274
IES_1	0.357	0.331	0.37	0.305	0.338	0.29	0.395	0.405	0.348	0.276	0.323	0.205	0.245	0.373	0.445	0.382							S-In	0.3193
IES_22	0.289	0.267	0.262	0.216	0.259	0.222	0.302	0.309	0.381	0.302	0.354	0.224	0.162	0.248	0.295	0.253	0.257						S-A	0.2397
IES_17	0.29	0.268	0.263	0.217	0.259	0.222	0.303	0.31	0.382	0.303	0.355	0.224	0.163	0.248	0.296	0.254	0.258	0.477					H-N	0.285812
IES_11	0.351	0.325	0.319	0.263	0.314	0.27	0.367	0.376	0.463	0.368	0.43	0.272	0.198	0.301	0.359	0.308	0.313	0.579	0.58				H-In	0.33755
IES_8	0.308	0.285	0.279	0.23	0.275	0.236	0.322	0.329	0.406	0.322	0.377	0.238	0.173	0.264	0.314	0.27	0.274	0.507	0.508	0.617			H-A	0.27345
IES_5	0.21	0.256	0.191	0.157	0.188	0.161	0.22	0.225	0.277	0.22	0.257	0.163	0.118	0.336	0.426	0.273	0.311	0.346	0.347	0.421	0.369		N-In	0.27235
																							N-A	0.3159
																							In-A	0.26688
																							HTMT ratio
																							Ir-S	0.571101
																							Ir-H	0.710401
																							Ir-N	0.544257
																							Ir-In	0.63316
																							Ir-A	0.471649
																							S-H	0.804739
																							S-N	0.590149
																							S-In	0.686181
																							S-A	0.438132
																							H-N	0.743971
																							H-In	0.876681
																							H-A	0.604058
																							N-In	0.79418
																							N-A	0.783499
																							In-A	0.660441
																							Column1	Column2	Column3	Column4	Column5	Column6	Column7
																								Avoidance	Intrusion	Numbing	Hyperarousal	Sleep	Irritability
																							Avoidance	--
																							Intrusion	0.66	--
																							Numbing	0.78	0.79	--
																							Hyperarousal	0.6	0.87	0.74	--
																							Sleep	0.44	0.69	0.59	0.8	--
																							Irritability	0.47	0.63	0.54	0.71	0.57	--
