# Supplementary material for: The Arabic Version of the Impact of Event Scale-Revised: Psychometric Evaluation among Psychiatric Patients and the General Public within the Context of COVID-19 Outbreak and Quarantine as Collective Traumatic Events
Source: J Pers Med. 2022 Apr 24;12(5):681. doi: 10.3390/jpm12050681 (PMC9144426; doi:10.3390/jpm12050681)
Supplement: Supplementary file 1 [file jpm-12-00681-s001.zip › IES-R Supplementary excel S1.xlsx]

## Sheet: Model 6 in Sample 1
Standardized Regression Weights: (Group number 1 - Default model)
			Estimate	S.E.	C.R.	P	Label
IES_1	<---	Intrusion	0.022
IES_3	<---	Intrusion	0.008	3.479	0.087	0.931	par_1
IES_6	<---	Intrusion	-0.212	51.639	-0.196	0.845	par_2
IES_9	<---	Intrusion	-0.214	52.135	-0.197	0.844	par_3
IES_14	<---	Intrusion	-0.069	16.077	-0.176	0.86	par_4
IES_16	<---	Intrusion	0.38	75.116	0.217	0.828	par_5
IES_20	<---	Intrusion	0.225	33.719	0.216	0.829	par_6
IES_15	<---	Hyperarousal	0.559	0.258	4.565	***	par_7
IES_18	<---	Hyperarousal	0.381	0.189	4.336	***	par_8
IES_2	<---	Hyperarousal	0.544
IES_7	<---	Numbing	0.355
IES_12	<---	Numbing	0.352	0.399	2.658	0.008	par_10
IES_13	<---	Numbing	0.412	0.415	2.791	0.005	par_11
IES_17	<---	Numbing	0.263	0.34	2.433	0.015	par_12
IES_4	<---	Irritability	0.609
IES_10	<---	Irritability	0.672	0.236	4.533	***	par_13
IES_19	<---	Intrusion	0.348	65.307	0.216	0.829	par_19
IES_21	<---	Numbing	0.001	0.297	0.013	0.99	par_20
IES_5	<---	Intrusion	-0.394	95.323	-0.203	0.84	par_22
IES_8	<---	Avoidance	0.645
IES_11	<---	Avoidance	0.493	0.144	5.156	***	par_23
IES_22	<---	Avoidance	0.419	0.14	4.561	***	par_24
IES_1	<---	Truama	0.736	0.09	10.817	***	par_29
IES_3	<---	Truama	0.593	0.082	8.181	***	par_30
IES_6	<---	Truama	0.771	0.098	10.945	***	par_31
IES_9	<---	Truama	0.683	0.103	9.294	***	par_32
IES_14	<---	Truama	0.544	0.09	7.329	***	par_33
IES_16	<---	Truama	0.784	0.098	10.059	***	par_34
IES_19	<---	Truama	0.661	0.095	8.226	***	par_35
IES_20	<---	Truama	0.427	0.076	5.327	***	par_36
IES_5	<---	Truama	0.69	0.117	8.457	***	par_37
IES_8	<---	Truama	0.453	0.113	5.642	***	par_38
IES_11	<---	Truama	0.56	0.104	7.34	***	par_39
IES_22	<---	Truama	0.506	0.106	6.586	***	par_40
IES_2	<---	Truama	0.542	0.093	7.308	***	par_41
IES_15	<---	Truama	0.604	0.104	8.319	***	par_42
IES_18	<---	Truama	0.641	0.104	8.996	***	par_43
IES_7	<---	Truama	0.379	0.095	4.882	***	par_44
IES_12	<---	Truama	0.404	0.1	5.234	***	par_45
IES_13	<---	Truama	0.298	0.096	3.773	***	par_46
IES_17	<---	Truama	0.594	0.099	8.176	***	par_47
IES_21	<---	Truama	0.524	0.105	7.031	***	par_48
IES_4	<---	Truama	0.623	0.098	8.623	***	par_49
IES_10	<---	Truama	0.635	0.095	8.811	***	par_50

## Sheet: Model 6 in Sample 2
Standardized Regression Weights: (Group number 1 - Default model)
			Estimate	S.E.	C.R.	P	Label
IES_1	<---	Intrusion	0.519
IES_3	<---	Intrusion	0.48	0.073	11.781	***	par_2
IES_6	<---	Intrusion	0.673	0.104	14.15	***	par_3
IES_9	<---	Intrusion	0.577	0.105	12.945	***	par_4
IES_14	<---	Intrusion	0.571	0.084	13.206	***	par_5
IES_16	<---	Intrusion	0.597	0.074	13.771	***	par_6
IES_20	<---	Intrusion	0.125	0.052	3.008	0.003	par_7
IES_15	<---	Hyperarousal	0.707	0.089	15.536	***	par_8
IES_18	<---	Hyperarousal	0.615	0.077	14.803	***	par_9
IES_2	<---	Hyperarousal	0.587
IES_7	<---	Numbing	0.276
IES_12	<---	Numbing	0.578	0.324	7.588	***	par_11
IES_13	<---	Numbing	0.363	0.219	6.796	***	par_12
IES_17	<---	Numbing	0.625	0.39	7.606	***	par_13
IES_4	<---	Irritability	0.798
IES_10	<---	Irritability	0.824	0.048	20.818	***	par_14
IES_19	<---	Intrusion	0.207	0.049	5.149	***	par_20
IES_21	<---	Numbing	0.445	0.287	7.15	***	par_21
IES_5	<---	Intrusion	0.587	0.106	13.075	***	par_23
IES_8	<---	Avoidance	0.697
IES_11	<---	Avoidance	0.832	0.056	22.086	***	par_24
IES_22	<---	Avoidance	0.623	0.047	18.308	***	par_25
IES_1	<---	Truama	0.348	0.02	18.662	***	a
IES_3	<---	Truama	0.374	0.02	18.662	***	a
IES_6	<---	Truama	0.305	0.02	18.662	***	a
IES_9	<---	Truama	0.285	0.02	18.662	***	a
IES_14	<---	Truama	0.343	0.02	18.662	***	a
IES_16	<---	Truama	0.393	0.02	18.662	***	a
IES_19	<---	Truama	0.552	0.02	18.662	***	a
IES_20	<---	Truama	0.534	0.02	18.662	***	a
IES_5	<---	Truama	0.284	0.02	18.662	***	a
IES_8	<---	Truama	0.294	0.02	18.662	***	a
IES_11	<---	Truama	0.284	0.02	18.662	***	a
IES_22	<---	Truama	0.303	0.02	18.662	***	a
IES_2	<---	Truama	0.395	0.02	18.662	***	a
IES_15	<---	Truama	0.344	0.02	18.662	***	a
IES_18	<---	Truama	0.361	0.02	18.662	***	a
IES_7	<---	Truama	0.371	0.02	18.662	***	a
IES_12	<---	Truama	0.316	0.02	18.662	***	a
IES_13	<---	Truama	0.327	0.02	18.662	***	a
IES_17	<---	Truama	0.283	0.02	18.662	***	a
IES_21	<---	Truama	0.291	0.02	18.662	***	a
IES_4	<---	Truama	0.333	0.02	18.662	***	a
IES_10	<---	Truama	0.343	0.02	18.662	***	a

## Sheet: 6-factor no error correlation
The fit of the six-factor structure of the IES-R without correlated errors
In the community sample
										CMIN
										Model	NPAR	CMIN	DF	P	CMIN/DF
										Default model	59	1070.02	194	0	5.516
										Saturated model	253	0	0
										Independence model	22	9346.53	231	0	40.461
										Baseline Comparisons
										Model	NFI	RFI	IFI	TLI	CFI
											Delta1	rho1	Delta2	rho2
										Default model	0.886	0.864	0.904	0.886	0.904
										Saturated model	1		1		1
										Independence model	0	0	0	0	0
										RMSEA
										Model	RMSEA	LO 90	HI 90	PCLOSE
										Default model	0.068	0.064	0.071	0
										Independence model	0.2	0.196	0.203	0
										SRMR = 0.0631
In the patient sample
										CMIN
										Model	NPAR	CMIN	DF	P	CMIN/DF
										Default model	59	376.248	194	0	1.939
										Saturated model	253	0	0
										Independence model	22	1897.43	231	0	8.214
										Baseline Comparisons
										Model	NFI	RFI	IFI	TLI	CFI
											Delta1	rho1	Delta2	rho2
										Default model	0.802	0.764	0.893	0.87	0.891
										Saturated model	1		1		1
										Independence model	0	0	0	0	0
										RMSEA
										Model	RMSEA	LO 90	HI 90	PCLOSE
										Default model	0.075	0.064	0.086	0
										Independence model	0.208	0.199	0.217	0
										SRMR = 0.0630

## Sheet: Model 8 in Sample 1
Standardized Regression Weights: (Group number 1 - Default model)
			Estimate	S.E.	C.R.	P	Label
IES_5	<---	Avoidance	0.459
IES_8	<---	Avoidance	0.623	0.278	5.191	***	par_2
IES_11	<---	Avoidance	0.642	0.265	5.294	***	par_3
IES_22	<---	Avoidance	0.507	0.238	4.729	***	par_4
IES_1	<---	Intrusion	0.436
IES_3	<---	Intrusion	0.21	0.183	2.341	0.019	par_5
IES_20	<---	Intrusion	-0.158	0.22	-1.294	0.196	par_6
IES_7	<---	Numbing	0.4
IES_13	<---	Numbing	0.485	0.339	3.644	***	par_7
IES_14	<---	Numbing	0.396	0.27	3.379	***	par_8
IES_16	<---	Hyperarousal	0.427
IES_18	<---	Hyperarousal	0.694	0.423	4.734	***	par_9
IES_19	<---	Hyperarousal	0.271	0.174	3.568	***	par_10
IES_21	<---	Hyperarousal	0.27	0.266	2.86	0.004	par_11
IES_2	<---	Sleep	0.568
IES_15	<---	Sleep	0.747	0.232	6.375	***	par_12
IES_4	<---	Irritability	0.686
IES_10	<---	Irritability	0.817	0.161	7.407	***	par_13
IES_12	<---	Numbing	0.545	0.384	3.745	***	par_29
IES_9	<---	Intrusion	0.54	0.295	4.631	***	par_30
IES_6	<---	Intrusion	0.67	0.349	4.751	***	par_31
IES_17	<---	Avoidance	0.523	0.237	4.825	***	par_32
IES_5	<---	Trauma	0.451	0.05	12.518	***	a
IES_8	<---	Trauma	0.423	0.05	12.518	***	a
IES_11	<---	Trauma	0.448	0.05	12.518	***	a
IES_17	<---	Trauma	0.448	0.05	12.518	***	a
IES_22	<---	Trauma	0.441	0.05	12.518	***	a
IES_1	<---	Trauma	0.514	0.05	12.518	***	a
IES_3	<---	Trauma	0.579	0.05	12.518	***	a
IES_6	<---	Trauma	0.477	0.05	12.518	***	a
IES_9	<---	Trauma	0.466	0.05	12.518	***	a
IES_20	<---	Trauma	0.654	0.05	12.518	***	a
IES_7	<---	Trauma	0.47	0.05	12.518	***	a
IES_12	<---	Trauma	0.445	0.05	12.518	***	a
IES_13	<---	Trauma	0.461	0.05	12.518	***	a
IES_14	<---	Trauma	0.509	0.05	12.518	***	a
IES_16	<---	Trauma	0.534	0.05	12.518	***	a
IES_18	<---	Trauma	0.433	0.05	12.518	***	a
IES_19	<---	Trauma	0.544	0.05	12.518	***	a
IES_21	<---	Trauma	0.442	0.05	12.518	***	a
IES_2	<---	Trauma	0.493	0.05	12.518	***	a
IES_15	<---	Trauma	0.439	0.05	12.518	***	a
IES_4	<---	Trauma	0.481	0.05	12.518	***	a
IES_10	<---	Trauma	0.48	0.05	12.518	***	a

## Sheet: Model 8 in Sample 2
Standardized A35Regression Weights: (Group number 1 - Default model)
			Estimate	S.E.	C.R.	P	Label
IES_5	<---	Avoidance	0.392
IES_8	<---	Avoidance	0.691	0.153	11.412	***	par_2
IES_11	<---	Avoidance	0.819	0.184	11.721	***	par_3
IES_22	<---	Avoidance	0.62	0.138	11.062	***	par_4
IES_1	<---	Intrusion	0.502
IES_3	<---	Intrusion	0.478	0.082	10.903	***	par_5
IES_20	<---	Intrusion	0.114	0.056	2.708	0.007	par_6
IES_7	<---	Numbing	0.293
IES_13	<---	Numbing	0.503	0.27	7.315	***	par_7
IES_14	<---	Numbing	0.581	0.281	7.566	***	par_8
IES_16	<---	Hyperarousal	0.618
IES_18	<---	Hyperarousal	0.622	0.07	15.72	***	par_9
IES_19	<---	Hyperarousal	0.267	0.045	6.905	***	par_10
IES_21	<---	Hyperarousal	0.522	0.087	13.273	***	par_11
IES_2	<---	Sleep	0.573
IES_15	<---	Sleep	0.842	0.134	12.726	***	par_12
IES_4	<---	Irritability	0.774
IES_10	<---	Irritability	0.846	0.053	19.991	***	par_13
IES_12	<---	Numbing	0.64	0.338	7.587	***	par_29
IES_9	<---	Intrusion	0.533	0.116	11.172	***	par_30
IES_6	<---	Intrusion	0.659	0.12	12.332	***	par_31
IES_17	<---	Avoidance	0.617	0.146	11.002	***	par_32
IES_5	<---	Trauma	0.293	0.02	19.17	***	a
IES_8	<---	Trauma	0.295	0.02	19.17	***	a
IES_11	<---	Trauma	0.284	0.02	19.17	***	a
IES_17	<---	Trauma	0.287	0.02	19.17	***	a
IES_22	<---	Trauma	0.303	0.02	19.17	***	a
IES_1	<---	Trauma	0.357	0.02	19.17	***	a
IES_3	<---	Trauma	0.38	0.02	19.17	***	a
IES_6	<---	Trauma	0.318	0.02	19.17	***	a
IES_9	<---	Trauma	0.293	0.02	19.17	***	a
IES_20	<---	Trauma	0.536	0.02	19.17	***	a
IES_7	<---	Trauma	0.372	0.02	19.17	***	a
IES_12	<---	Trauma	0.317	0.02	19.17	***	a
IES_13	<---	Trauma	0.324	0.02	19.17	***	a
IES_14	<---	Trauma	0.348	0.02	19.17	***	a
IES_16	<---	Trauma	0.396	0.02	19.17	***	a
IES_18	<---	Trauma	0.361	0.02	19.17	***	a
IES_19	<---	Trauma	0.547	0.02	19.17	***	a
IES_21	<---	Trauma	0.291	0.02	19.17	***	a
IES_2	<---	Trauma	0.401	0.02	19.17	***	a
IES_15	<---	Trauma	0.345	0.02	19.17	***	a
IES_4	<---	Trauma	0.336	0.02	19.17	***	a
IES_10	<---	Trauma	0.344	0.02	19.17	***	a

## Sheet: 6-factor second order
The fit of the second-order+A18 six-factor structure of the IES-R without correlated errors
In the community sample
															CMIN
															Model	NPAR	CMIN	DF	P	CMIN/DF
															Default model	55	1063.78	198	0	5.373
															Saturated model	253	0	0
															Independence model	22	9346.53	231	0	40.461
															Baseline Comparisons
															Model	NFI	RFI	IFI	TLI	CFI
																Delta1	rho1	Delta2	rho2
															Default model	0.886	0.867	0.905	0.889	0.905
															Saturated model	1		1		1
															Independence model	0	0	0	0	0
															RMSEA
															Model	RMSEA	LO 90	HI 90	PCLOSE
															Default model	0.066	0.063	0.07	0
															Independence model	0.2	0.196	AQAQ`1EERRRTGRDDFEWWS21QW3EXEW	0
															SRMR = 0.0641
																a
In the patient sample
															CMIN
															Model	NPAR	CMIN	DF	P	CMIN/DF
															Default model	53	368.394	200	0	1.842
															Saturated model	253	0	0
															Independence model	22	1897.43	231	0	8.214
															Baseline Comparisons
															Model	NFI	RFI	IFI	TLI	CFI
																Delta1	rho1	Delta2	rho2
															Default model	0.806	0.776	0.901	0.883	0.899
															Saturated model	1		1		1
															Independence model	0	0	0	0	0
															RMSEA
															Model	RMSEA	LO 90	HI 90	PCLOSE
															Default model	0.071	0.06	0.082	0.002
															Independence model	0.208	0.199	0.217	0
															SRMR = 0.0656

## Sheet: Mann Whitney z score sample 1  
Ranks
Sex		N	Mean Rank	Sum of Ranks
Psychological Trauma	Female	119	86.9706	10349.5
	Male	49	78.5	3846.5
	Total	168
IES_Avoidance	Female	119	84.9076	10104
	Male	49	83.5102	4092
	Total	168
IES_Intrusion	Female	119	85.4496	10168.5
	Male	49	82.1939	4027.5
	Total	168
IES_Numbing	Female	119	87.0588	10360
	Male	49	78.2857	3836
	Total	168
IES_Hyperarousal	Female	119	87.6345	10428.5
	Male	49	76.8878	3767.5
	Total	168
IES_Sleep	Female	119	85.4538	10169
	Male	49	82.1837	4027
	Total	168
IES_Irritability	Female	119	90.2353	10738
	Male	49	70.5714	3458
	Total	168
Test Statisticsa
	Psychological Trauma	IES_Avoidance	IES_Intrusion	IES_Numbing	IES_Hyperarousal	IES_Sleep	IES_Irritability
Mann-Whitney U	2621.5	2867	2802.5	2611	2542.5	2802	2233
Wilcoxon W	3846.5	4092	4027.5	3836	3767.5	4027	3458
Z	-1.02622	-0.169595	-0.395926	-1.069	-1.30926	-0.403619	-2.42844
Asymp. Sig. (2-tailed)	0.304787	0.865328	0.692159	0.285069	0.190445	0.686493	0.015164
a. Grouping Variable: Sex
Ranks
Marital2cat		N	Mean Rank	Sum of Ranks
Psychological Trauma	single	91	84.4451	7684.5
	Married	77	84.5649	6511.5
	Total	168
IES_Avoidance	single	91	81.9286	7455.5
	Married	77	87.539	6740.5
	Total	168
IES_Intrusion	single	91	83.3846	7588
	Married	77	85.8182	6608
	Total	168
IES_Numbing	single	91	81.6099	7426.5
	Married	77	87.9156	6769.5
	Total	168
IES_Hyperarousal	single	91	83.5385	7602
	Married	77	85.6364	6594
	Total	168
IES_Sleep	single	91	83.5824	7606
	Married	77	85.5844	6590
	Total	168
IES_Irritability	single	91	89.6429	8157.5
	Married	77	78.4221	6038.5
	Total	168
Test Statisticsa
	Psychological Trauma	IES_Avoidance	IES_Intrusion	IES_Numbing	IES_Hyperarousal	IES_Sleep	IES_Irritability
Mann-Whitney U	3498.5	3269.5	3402	3240.5	3416	3420	3035.5
Wilcoxon W	7684.5	7455.5	7588	7426.5	7602	7606	6038.5
Z	-0.015921	-0.746438	-0.32442	-0.842272	-0.280177	-0.270874	-1.51906
Asymp. Sig. (2-tailed)	0.987297	0.455403	0.74562	0.399636	0.779342	0.786488	0.128747
a. Grouping Variable: Marital2cat
Ranks
Age two categories		N	Mean Rank	Sum of Ranks
Psychological Trauma	18-30 years	87	88.9943	7742.5
	31 years and older	81	79.6728	6453.5
	Total	168
IES_Avoidance	18-30 years	87	86.8391	7555
	31 years and older	81	81.9877	6641
	Total	168
IES_Intrusion	18-30 years	87	86.7586	7548
	31 years and older	81	82.0741	6648
	Total	168
IES_Numbing	18-30 years	87	87.3046	7595.5
	31 years and older	81	81.4877	6600.5
	Total	168
IES_Hyperarousal	18-30 years	87	86.3276	7510.5
	31 years and older	81	82.537	6685.5
	Total	168
IES_Sleep	18-30 years	87	87.1839	7585
	31 years and older	81	81.6173	6611
	Total	168
IES_Irritability	18-30 years	87	93.454	8130.5
	31 years and older	81	74.8827	6065.5
	Total	168
Test Statisticsa
	Psychological Trauma	IES_Avoidance	IES_Intrusion	IES_Numbing	IES_Hyperarousal	IES_Sleep	IES_Irritability
Mann-Whitney U	3132.5	3320	3327	3279.5	3364.5	3290	2744.5
Wilcoxon W	6453.5	6641	6648	6600.5	6685.5	6611	6065.5
Z	-1.24148	-0.647301	-0.626279	-0.779203	-0.507674	-0.755322	-2.52134
Asymp. Sig. (2-tailed)	0.214428	0.517437	0.531132	0.43586	0.611682	0.450056	0.0116909
a. Grouping Variable: Age two categories

## Sheet: Mann Whitney z score sample 2
Ranks
Sex		N	Mean Rank	Sum of Ranks
TotIESR	Female	622	539.493	335564
	Male	370	424.226	156964
	Total	992
IES_Avoidance	Female	622	540.462	336168
	Male	370	422.596	156360
	Total	992
IES_Intrusion	Female	622	529.646	329440
	Male	370	440.778	163088
	Total	992
IES_Numbing	Female	622	523.161	325406
	Male	370	451.681	167122
	Total	992
IES_Hyperarousal	Female	622	529.834	329557
	Male	370	440.464	162972
	Total	992
IES_Sleep	Female	622	503.773	313346
	Male	370	484.274	179182
	Total	992
IES_Irritability	Female	622	527.946	328382
	Male	370	443.636	164146
	Total	992
Test Statisticsa
	TotIESR	IES_Avoidance	IES_Intrusion	IES_Numbing	IES_Hyperarousal	IES_Sleep	IES_Irritability
Mann-Whitney U	88328.5	87725.5	94453	98487	94336.5	110546	95510.5
Wilcoxon W	156964	156360	163088	167122	162972	179182	164146
Z	-6.13166	-6.29677	-4.7667	-3.84323	-4.83344	-1.12415	-4.78391
Asymp. Sig. (2-tailed)	8.69647e-10	3.03921e-10	1.87265e-06	0.000121424	1.34192e-06	0.260948	1.71917e-06
a. Grouping Variable: Sex
Ranks
Marital2Cat		N	Mean Rank	Sum of Ranks
TotIESR	single	439	535.556	235109
	Married	553	465.495	257419
	Total	992
IES_Avoidance	single	439	508.961	223434
	Married	553	486.608	269094
	Total	992
IES_Intrusion	single	439	528.756	232124
	Married	553	470.893	260404
	Total	992
IES_Numbing	single	439	507.974	223000
	Married	553	487.392	269528
	Total	992
IES_Hyperarousal	single	439	551.198	241976
	Married	553	453.078	250552
	Total	992
IES_Sleep	single	439	525.137	230535
	Married	553	473.767	261993
	Total	992
IES_Irritability	single	439	548.133	240630
	Married	553	455.511	251898
	Total	992
Test Statisticsa
	TotIESR	IES_Avoidance	IES_Intrusion	IES_Numbing	IES_Hyperarousal	IES_Sleep	IES_Irritability
Mann-Whitney U	104238	115913	107223	116346	97371	108812	98716.5
Wilcoxon W	257419	269094	260404	269528	250552	261993	251898
Z	-3.82775	-1.22652	-3.18766	-1.1366	-5.45033	-3.04186	-5.39785
Asymp. Sig. (2-tailed)	0.000129318	0.220002	0.00143427	0.255707	5.02773e-08	0.00235123	6.7445e-08
a. Grouping Variable: Marital2Cat
Ranks
Age 2 Categories		N	Mean Rank	Sum of Ranks
TotIESR	30 Years or below	448	529.776	237340
	Above 30 Years	544	469.097	255188
	Total	992
IES_Avoidance	30 Years or below	448	507.904	227541
	Above 30 Years	544	487.108	264987
	Total	992
IES_Intrusion	30 Years or below	448	523.656	234598
	Above 30 Years	544	474.136	257930
	Total	992
IES_Numbing	30 Years or below	448	507.209	227230
	Above 30 Years	544	487.681	265298
	Total	992
IES_Hyperarousal	30 Years or below	448	537.905	240982
	Above 30 Years	544	462.402	251546
	Total	992
IES_Sleep	30 Years or below	448	512.018	229384
	Above 30 Years	544	483.721	263144
	Total	992
IES_Irritability	30 Years or below	448	546.68	244912
	Above 30 Years	544	455.176	247616
	Total	992
Test Statisticsa
	TotIESR	IES_Avoidance	IES_Intrusion	IES_Numbing	IES_Hyperarousal	IES_Sleep	IES_Irritability
Mann-Whitney U	106948	116747	109690	117058	103306	114904	99375.5
Wilcoxon W	255188	264987	257930	265298	251546	263144	247616
Z	-3.32166	-1.14325	-2.73337	-1.08045	-4.20217	-1.67887	-5.34305
Asymp. Sig. (2-tailed)	0.000894841	0.252935	0.00626903	0.27994	2.64367e-05	0.0931768	9.13974e-08
a. Grouping Variable: Age 2 Categories

## Sheet: Age groups in all samples
Qarantine Sample
Age
N	Valid	214
	Missing	0
Age
		Frequency	Percent	Valid Percent	Cumulative Percent
Valid	18-30	120	56.0748	56.0748	56.0748
	31-40	65	30.3738	30.3738	86.4486
	41-50	16	7.47664	7.47664	93.9252
	51-60	9	4.20561	4.20561	98.1308
	older than 60	4	1.86916	1.86916	100		0.061
	Total	214	100	100
Psychiatric patient Sample
Age
N	Valid	168
	Missing	0
Age
		Frequency	Percent	Valid Percent	Cumulative Percent
Valid	18-30	87	51.7857	51.7857	51.7857
	31-40	38	22.619	22.619	74.4048
	41-50	27	16.0714	16.0714	90.4762
	51-60	13	7.7381	7.7381	98.2143
	Older than 60	3	1.78571	1.78571	100		0.095
	Total	168	100	100
General public Sample
Age
N	Valid	992
	Missing	0
Age
		Frequency	Percent	Valid Percent	Cumulative Percent
Valid	18-30	448	45.1613	45.1613	45.1613
	31-40	232	23.3871	23.3871	68.5484
	41-50	173	17.4395	17.4395	85.9879
	51-60	106	10.6855	10.6855	96.6734
	Older than 60	33	3.32661	3.32661	100		0.14
	Total	992	100	100
